# Supplementary material for: Facebook Use Predicts Declines in Subjective Well-Being in Young Adults
Source: PLOS journal article supplement (doi:10.1371/journal.pone.0069841), 2013-08-14
Supplement: S6 (10.1371/journal.pone.0069841.s006) [file journal.pone.0069841.s006]

(listing pending)
